# Supplementary material
Source: MDPI journal article supplement (https://www.mdpi.com/2071-1050/16/8/3295)
Supplement: s1 [file s1]

Design analysis results

Table S1 Design analysis results based on information available on corporate websites and reports, and interviews and articles in magazines

| Design analysis results |                                      |                                 |                   |    | Aesthetics |        | Functionality                                   |                                        |                                            |                                                            |         |        | Sustainability       |         |        |                               |     |     |       | Marketing and Communication   |         |            |            |                                    |         |              |             |          |           |
|-------------------------|--------------------------------------|---------------------------------|-------------------|----|------------|--------|-------------------------------------------------|----------------------------------------|--------------------------------------------|------------------------------------------------------------|---------|--------|----------------------|---------|--------|-------------------------------|-----|-----|-------|-------------------------------|---------|------------|------------|------------------------------------|---------|--------------|-------------|----------|-----------|
|                         |                                      |                                 |                   |    | Shape      | Colour | Performance compared to fossil-based equivalent |                                        |                                            | Durability compared to fossil-based equivalent             |         |        | Feedstock generation |         |        | Recovery mentioned by company |     |     |       | Bio-based communicated in/on: |         |            |            |                                    |         |              |             |          |           |
|                         |                                      |                                 |                   |    |            |        | Similar to fossil-based equivalent product      | Specific design for bio-based material | Similar to fossil-based equivalent product | Specific colours for bio-based material (potentially) less | Similar | Better | (potentially) less   | Similar | Better | 1st                           | 2nd | 3rd | Reuse | Repair                        | Recycle | Biodegrade | Incinerate | Recovery arrangements from company | Product | Product name | Description | Campaign | Packaging |
|                         |                                      |                                 |                   |    |            |        |                                                 |                                        |                                            |                                                            |         |        |                      |         |        |                               |     |     |       |                               |         |            |            |                                    |         |              |             |          |           |
| Brand                   | Product name                         | Category                        | Bio-based plastic | #  |            |        |                                                 |                                        |                                            |                                                            |         |        |                      |         |        |                               |     |     |       |                               |         |            |            |                                    |         |              |             |          |           |
| Adidas                  | Futurecraft footprint                | Clothing & Footwear             | EVA, cellulose    | 1  |            |        |                                                 |                                        |                                            |                                                            |         |        |                      |         |        |                               |     |     |       |                               |         |            |            |                                    |         |              |             |          |           |
| Dansko                  | Kane                                 | Clothing & Footwear             | EVA               | 2  |            |        |                                                 |                                        |                                            |                                                            |         |        |                      |         |        |                               |     |     |       |                               |         |            |            |                                    |         |              |             |          |           |
| Scarpa                  | Mojito BIO                           | Clothing & Footwear             | EVA               | 3  |            |        |                                                 |                                        |                                            |                                                            |         |        |                      |         |        |                               |     |     |       |                               |         |            |            |                                    |         |              |             |          |           |
| Vivobarefoot            | Ultra III Bloom                      | Clothing & Footwear             | EVA               | 4  |            |        |                                                 |                                        |                                            |                                                            |         |        |                      |         |        |                               |     |     |       |                               |         |            |            |                                    |         |              |             |          |           |
| On running              | Cloudneo                             | Clothing & Footwear             | PA                | 5  |            |        |                                                 |                                        |                                            |                                                            |         |        |                      |         |        |                               |     |     |       |                               |         |            |            |                                    |         |              |             |          |           |
| Vaude                   | Skarvan Biobased Pants               | Clothing & Footwear             | PA                | 6  |            |        |                                                 |                                        |                                            |                                                            |         |        |                      |         |        |                               |     |     |       |                               |         |            |            |                                    |         |              |             |          |           |
| Mizuno                  | Wave rider 24                        | Clothing & Footwear             | TPE               | 7  |            |        |                                                 |                                        |                                            |                                                            |         |        |                      |         |        |                               |     |     |       |                               |         |            |            |                                    |         |              |             |          |           |
| Reebok                  | Cotton + Corn                        | Clothing & Footwear             | TPE               | 8  |            |        |                                                 |                                        |                                            |                                                            |         |        |                      |         |        |                               |     |     |       |                               |         |            |            |                                    |         |              |             |          |           |
| Vaude                   | Skarvan shoes                        | Clothing & Footwear             | TPE               | 9  |            |        |                                                 |                                        |                                            |                                                            |         |        |                      |         |        |                               |     |     |       |                               |         |            |            |                                    |         |              |             |          |           |
| Veja                    | Condor 2                             | Clothing & Footwear             | TPE               | 10 |            |        |                                                 |                                        |                                            |                                                            |         |        |                      |         |        |                               |     |     |       |                               |         |            |            |                                    |         |              |             |          |           |
| Vivobarefoot            | Primus Lite II bio                   | Clothing & Footwear             | TPE               | 11 |            |        |                                                 |                                        |                                            |                                                            |         |        |                      |         |        |                               |     |     |       |                               |         |            |            |                                    |         |              |             |          |           |
| Tramontina              | Jet chair                            | Furniture                       | PE                | 12 |            |        |                                                 |                                        |                                            |                                                            |         |        |                      |         |        |                               |     |     |       |                               |         |            |            |                                    |         |              |             |          |           |
| Kartell                 | Componibili Bio                      | Furniture                       | PHA               | 13 |            |        |                                                 |                                        |                                            |                                                            |         |        |                      |         |        |                               |     |     |       |                               |         |            |            |                                    |         |              |             |          |           |
| Alki Kuskoo             | Bi chair                             | Furniture                       | PLA               | 14 |            |        |                                                 |                                        |                                            |                                                            |         |        |                      |         |        |                               |     |     |       |                               |         |            |            |                                    |         |              |             |          |           |
| Label Breed             | 1.42 wool & bio-based plastic carpet | Furniture                       | PLA               | 15 |            |        |                                                 |                                        |                                            |                                                            |         |        |                      |         |        |                               |     |     |       |                               |         |            |            |                                    |         |              |             |          |           |
| Zanotta                 | Sacco goes green                     | Furniture                       | PLA               | 16 |            |        |                                                 |                                        |                                            |                                                            |         |        |                      |         |        |                               |     |     |       |                               |         |            |            |                                    |         |              |             |          |           |
| Orthex                  | GastroMax Bio                        | Household appliances & utensils | PA                | 17 |            |        |                                                 |                                        |                                            |                                                            |         |        |                      |         |        |                               |     |     |       |                               |         |            |            |                                    |         |              |             |          |           |
| Ajaa                    | Naturbox                             | Household appliances & utensils | PE                | 18 |            |        |                                                 |                                        |                                            |                                                            |         |        |                      |         |        |                               |     |     |       |                               |         |            |            |                                    |         |              |             |          |           |
| BE O Lifestyle          | BE O bottle                          | Household appliances & utensils | PE                | 19 |            |        |                                                 |                                        |                                            |                                                            |         |        |                      |         |        |                               |     |     |       |                               |         |            |            |                                    |         |              |             |          |           |
| Biodora                 | Fruchtpresse                         | Household appliances & utensils | PE                | 20 |            |        |                                                 |                                        |                                            |                                                            |         |        |                      |         |        |                               |     |     |       |                               |         |            |            |                                    |         |              |             |          |           |
| Biodora                 | Schneidbrett                         | Household appliances & utensils | PE                | 21 |            |        |                                                 |                                        |                                            |                                                            |         |        |                      |         |        |                               |     |     |       |                               |         |            |            |                                    |         |              |             |          |           |
| Light my Fire           | Bowl'n Lid BIO                       | Household appliances & utensils | PE                | 22 |            |        |                                                 |                                        |                                            |                                                            |         |        |                      |         |        |                               |     |     |       |                               |         |            |            |                                    |         |              |             |          |           |
| Orthex                  | GastroMax cutting board              | Household appliances & utensils | PE                | 23 |            |        |                                                 |                                        |                                            |                                                            |         |        |                      |         |        |                               |     |     |       |                               |         |            |            |                                    |         |              |             |          |           |
| Orthex                  | Pizza cutter BIO                     | Household appliances & utensils | PE                | 24 |            |        |                                                 |                                        |                                            |                                                            |         |        |                      |         |        |                               |     |     |       |                               |         |            |            |                                    |         |              |             |          |           |
| Retulp                  | Bio Bidon                            | Household appliances & utensils | PE                | 25 |            |        |                                                 |                                        |                                            |                                                            |         |        |                      |         |        |                               |     |     |       |                               |         |            |            |                                    |         |              |             |          |           |
| IKEA                    | TALRIKA                              | Household appliances & utensils | PLA               | 26 |            |        |                                                 |                                        |                                            |                                                            |         |        |                      |         |        |                               |     |     |       |                               |         |            |            |                                    |         |              |             |          |           |
| Zuperzozial             | Time-Out Mug                         | Household appliances & utensils | PLA               | 27 |            |        |                                                 |                                        |                                            |                                                            |         |        |                      |         |        |                               |     |     |       |                               |         |            |            |                                    |         |              |             |          |           |
| Philips                 | Eco Consious Edition HD9365/10       | Household appliances & utensils | PP                | 28 |            |        |                                                 |                                        |                                            |                                                            |         |        |                      |         |        |                               |     |     |       |                               |         |            |            |                                    |         |              |             |          |           |
| Light my Fire           | Pack-up-Cup BIO                      | Household appliances & utensils | TPE               | 29 |            |        |                                                 |                                        |                                            |                                                            |         |        |                      |         |        |                               |     |     |       |                               |         |            |            |                                    |         |              |             |          |           |
| Fujitsu                 | Mouse M440 ECO                       | Information & communication     | cellulose         | 30 |            |        |                                                 |                                        |                                            |                                                            |         |        |                      |         |        |                               |     |     |       |                               |         |            |            |                                    |         |              |             |          |           |
| BioSerie                | BioCover Iphone 5 case               | Information & communication     | PLA               | 31 |            |        |                                                 |                                        |                                            |                                                            |         |        |                      |         |        |                               |     |     |       |                               |         |            |            |                                    |         |              |             |          |           |
| Lexon design            | Maizy radio                          | Information & communication     | PLA               | 32 |            |        |                                                 |                                        |                                            |                                                            |         |        |                      |         |        |                               |     |     |       |                               |         |            |            |                                    |         |              |             |          |           |

\*1 Adidas had a choose to give back program (Resale-as-a-Service) via the adidas Creator's Club app to be reused or resold

\*2 Focus on CO2 footprint

\*3 Focus on biodegradable

\*4 Revivo program

\*5 100% recyclable: complete shoe at ones. Recycle after +/- months/600 km

\*6 Only available through subscription service, return when done with the product

\*7 Repair service in place, unknown if pants will be recycled in their 'green shape' program

\*8 Repair service in place, unknown if pants will be recycled in their 'green shape' program

\*9 VEJA x Darwin, a test-hub for cleaning, repairing and recycling old sneakers. In shops in Paris, Bordeaux and New York.

\*10 Revivo program

\*11 'C-PLA is recyclable, but not in current disposal system.'

\*12 The granulate is biodegradable, the end-product has no certificates yet

\*13 Problem solving and repair tips per product on their website + spare parts available online

\*14 Fujitsu has a WEEE-compliant take-back program in Europe + Trade-in Program

\*15 Possible, but realize that current facilities are not handling these materials

\*16 'A high proportion of plant material means that especially light-coloured products are more susceptible to discoloration and scratches

\*17 Can send back to recycle in their production. Get 30% voucher

\*18 'Never leave your sunglasses inside the car as the temperature or direct heat from sunlight can cause damage to the frame and the lenses.

\*19 Made to last

\*20 Repair service in place, unknown if pants will be recycled in their 'green shape' program

\*21 Mattel PlayBack program in USA, Canada, France, Germany, UK: recycle materials and reuse in new products. Not possible: downcycle or energy recovery

\*22 Reuse program currently only available in the US and Canada

\*23 Mattel PlayBack program in USA, Canada, France, Germany, UK: recycle materials and reuse in new products. Not possible: downcycle or energy recovery

\*24 Do not recommend reuse due to hygienic reasons (meant to be put in baby's mouth to relieve during teething'

\*25 Unclear if Scarpa is using the 'Virtucycle Program' of material manufacturer Arkema

\*26 Also in soil and water

\*27 'We use granulate obtained from plants that are also native to our region
